# Supplementary material for: Early versus late initiation of renal replacement therapy in patients with acute kidney injury-a systematic review & meta-analysis of randomized controlled trials
Source: Springer Nature journal article supplement (doi:10.1186/s12882-017-0486-9), 2017-02-28
Supplement: MOESM1 [file 12101122]

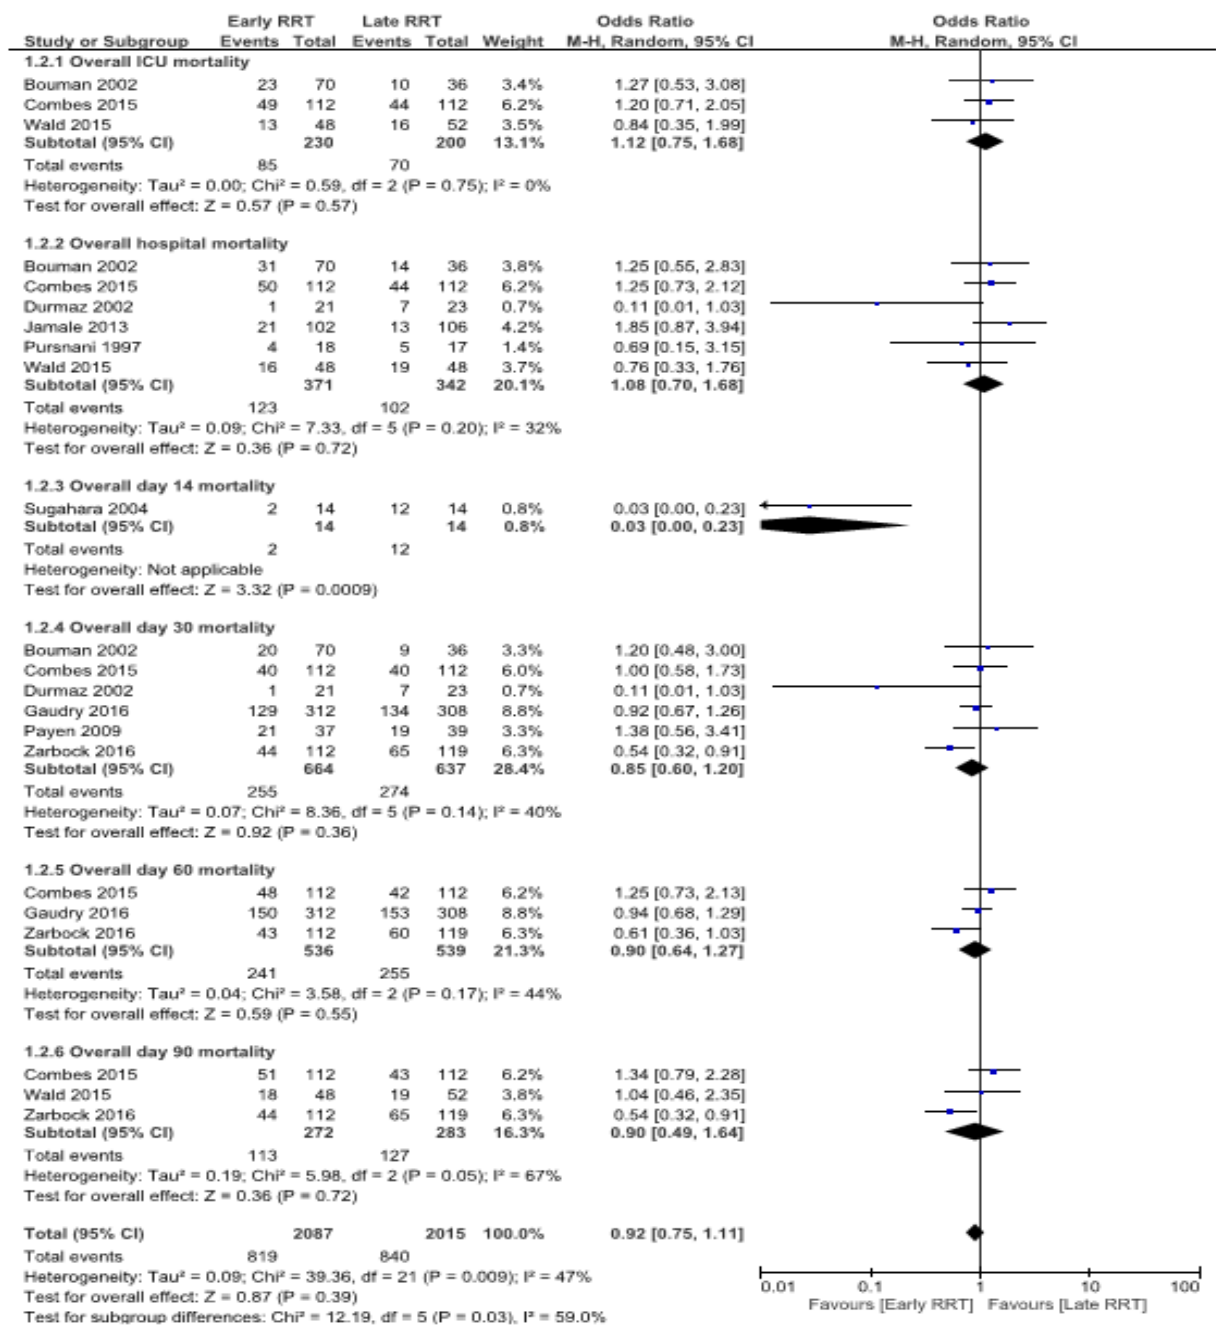

Figure S 1 a: Period -wise mortality

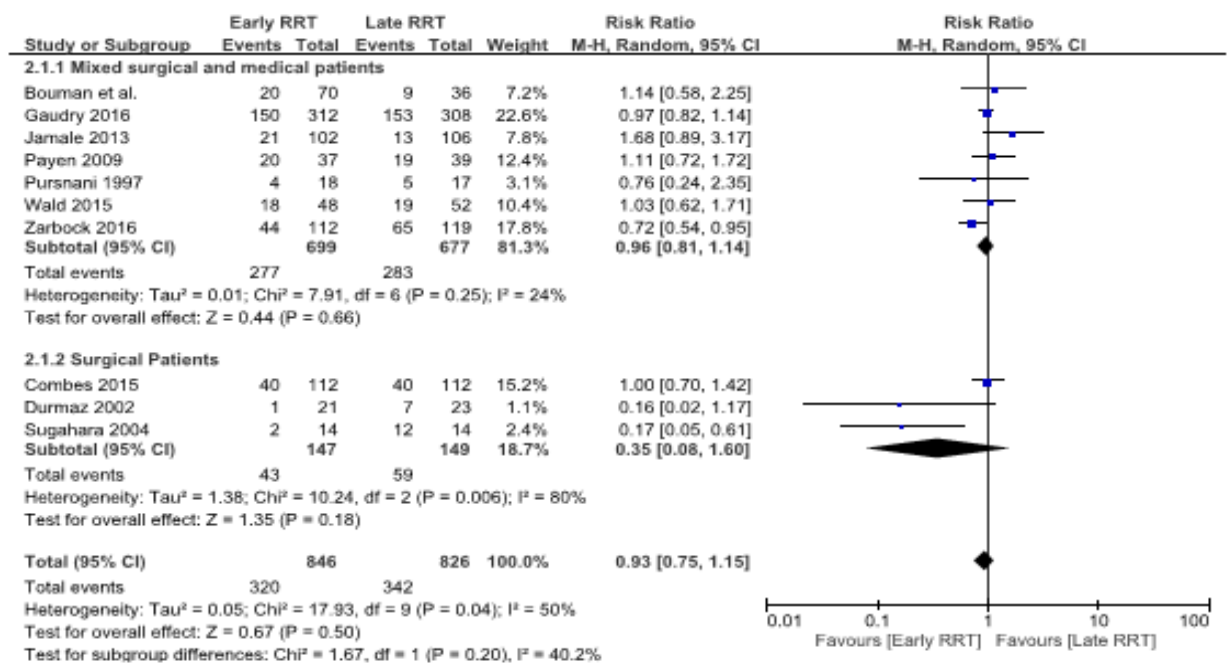

Figure S 1 b: Subgroup; Mixed Vs surgical patients

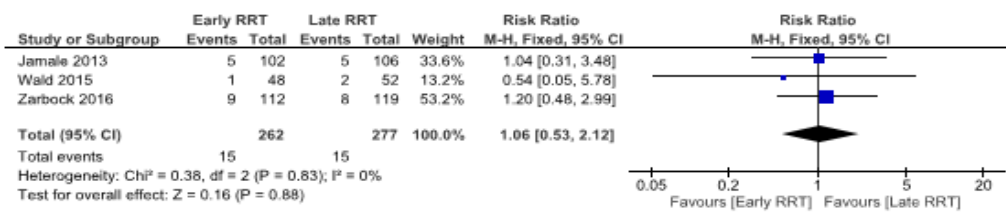

**Fig S1 c: Dialysis dependence on day 90**

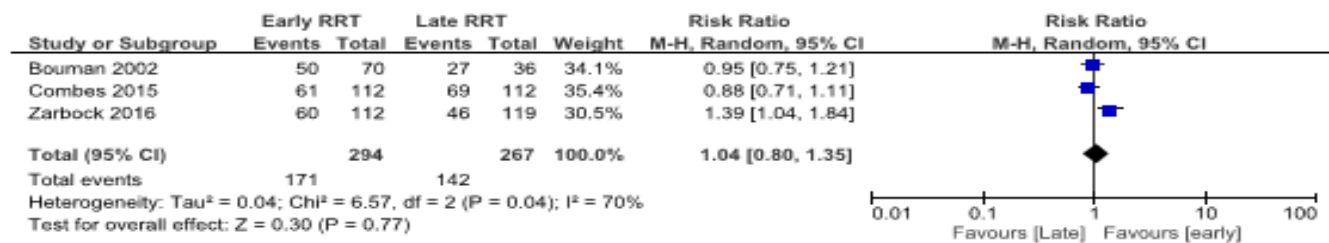

Fig S 1 d: Recovery of renal functions by day 90
